# Supplementary material
Source: publisher figshare collection journal article supplement (https://springernature.figshare.com/ndownloader/files/12941972)
Supplement: Supplementary file [file 12941972]

**Table S1: Muscle elasticity at rest and during tetanic contraction**

|                          | <b>rest</b>      | <b>tetanic contraction</b> | p value             |
|--------------------------|------------------|----------------------------|---------------------|
| <b>muscle elasticity</b> | 62.5 [59.0;67.8] | 58.5 [56.5;63.0]           | <b>p &lt;0.0001</b> |

Mean elasticity values determined by ultrasound strain elastography at rest and during tetanic contraction as non-dimensional value from 0 (hard) to 100 (soft), data presented as median and interquartile range, paired t-test for differences between resting condition and tetanic contraction.
